# Supplementary material for: All Set before Flowering: A 16S Gene Amplicon-Based Analysis of the Root Microbiome Recruited by Common Bean (Phaseolus vulgaris) in Its Centre of Domestication
Source: MDPI journal article supplement (doi:10.3390/plants11131631), 2022-06-21
Supplement: s1 [file s1]

**Supplementary material** to Medina-Paz, F.; Herrera-Estrella, L.; Heil, M. All set before flowering: A 16S gene amplicon-based analysis of the root microbiome recruited by common bean (*Phaseolus vulgaris*) in its center of domestication. Plants 2022, 11, x. <https://doi.org/10.3390/xxxxx>

**Tables S1, S2, S3, S6**

**Figure S1**

**Supplementary Methods 1**

**Table S1** Description of 16S rRNA gene amplicons of rhizosphere and endosphere samples of *Phaseolus vulgaris* subjected to sequencing on the MiSeq 2x300 Illumina platform

| BioSample<br>accession <sup>1</sup> | Code | Compartment | Description |           | Size | Raw              | Read numbers     |                  |
|-------------------------------------|------|-------------|-------------|-----------|------|------------------|------------------|------------------|
|                                     |      |             | Stage       | Replicate |      |                  | Reads 1          | Reads 2          |
| SAMN23426372                        | VR1  | Rhizosphere | Vegetative  | 1         | 774  | 1,010,079        | 933,482          | 812,089          |
| SAMN23426373                        | VE1  | Endosphere  | Vegetative  | 1         | 803  | 986,255          | 946,019          | 869,969          |
| SAMN23426374                        | FR1  | Rhizosphere | Flowering   | 1         | 766  | 1,126,812        | 1,053,603        | 916,172          |
| SAMN23426375                        | FE1  | Endosphere  | Flowering   | 1         | 858  | 881,729          | 836,106          | 768,793          |
| SAMN23426376                        | PR1  | Rhizosphere | Pod filling | 1         | 788  | 1,013,548        | 944,181          | 799,497          |
| SAMN23426377                        | PE1  | Endosphere  | Pod filling | 1         | 894  | 794,281          | 749,457          | 688,024          |
| SAMN23426378                        | VR2  | Rhizosphere | Vegetative  | 2         | 777  | 1,005,419        | 941,504          | 807,296          |
| SAMN23426379                        | VE2  | Endosphere  | Vegetative  | 2         | 827  | 966,592          | 929,127          | 853,062          |
| SAMN23426380                        | FR2  | Rhizosphere | Flowering   | 2         | 780  | 1,207,781        | 1,127,473        | 977,216          |
| SAMN2342638                         | FE2  | Endosphere  | Flowering   | 2         | 846  | 991,475          | 940,805          | 852,042          |
| <b>Sum</b>                          |      |             |             |           |      | <b>9,983,971</b> | <b>9,401,757</b> | <b>8,344,160</b> |

<sup>1</sup>BioProject ID: PRJNA783305, Submission ID: SUB10705228

**Table S2** BLAST annotations of sequences cloned from the ~750bp and the ~1300bp band of PCR products generated with primers 799f and 1492r from bean endosphere DNA

| #                                          | Clone   | Accession | Identity [%] | Length |     | M<br>M | GO | Query |     | E | Sequence |       | Bit     | Sequence Title                                        |
|--------------------------------------------|---------|-----------|--------------|--------|-----|--------|----|-------|-----|---|----------|-------|---------|-------------------------------------------------------|
|                                            |         |           |              | Ali    | Qu  |        |    | start | end |   | Start    | End   | Score   |                                                       |
| <b>Sequences of clones from 750bp band</b> |         |           |              |        |     |        |    |       |     |   |          |       |         |                                                       |
| 1                                          | P15C5F  | OL467029  | 95.80        | 731    | 762 | 1      | 0  | 21    | 751 | 0 | 66106    | 66836 | 1345.48 | <i>Rhizobium etli</i> bv. <i>phaseoli</i> str. IE4803 |
|                                            | P15C5R  | OL467030  | 95.80        | 731    | 762 | 1      | 0  | 12    | 742 | 0 | 66836    | 66106 | 1345.48 | <i>Rhizobium etli</i> bv. <i>phaseoli</i> str. IE4803 |
| 2                                          | P15C7F  | OL467011  | 95.80        | 731    | 762 | 2      | 0  | 21    | 751 | 0 | 66106    | 66836 | 1339.94 | <i>Rhizobium etli</i> bv. <i>phaseoli</i> str. IE4803 |
|                                            | P15C7R  | OL467012  | 95.80        | 731    | 762 | 2      | 0  | 12    | 742 | 0 | 66836    | 66106 | 1339.94 | <i>Rhizobium etli</i> bv. <i>phaseoli</i> str. IE4803 |
| 3                                          | P15C10F | OL467013  | 95.80        | 731    | 762 | 2      | 0  | 21    | 751 | 0 | 66106    | 66836 | 1339.94 | <i>Rhizobium etli</i> bv. <i>phaseoli</i> str. IE4803 |
|                                            | P15C10R | OL467014  | 95.80        | 731    | 762 | 2      | 0  | 12    | 742 | 0 | 66836    | 66106 | 1339.94 | <i>Rhizobium etli</i> bv. <i>phaseoli</i> str. IE4803 |
| 4                                          | P15C11F | OL467015  | 96.84        | 737    | 760 | 2      | 2  | 13    | 749 | 0 | 66102    | 66836 | 1343.63 | <i>Rhizobium etli</i> bv. <i>phaseoli</i> str. IE4803 |
|                                            | P15C11R | OL467015  | 96.84        | 737    | 760 | 2      | 2  | 12    | 748 | 0 | 66836    | 66102 | 1343.63 | <i>Rhizobium etli</i> bv. <i>phaseoli</i> str. IE4803 |
| 5                                          | P15C12F | OL467017  | 95.41        | 731    | 762 | 10     | 1  | 24    | 751 | 0 | 66107    | 66836 | 1288.24 | <i>Rhizobium etli</i> bv. <i>phaseoli</i> str. IE4803 |
|                                            | P15C12R | OL467018  | 95.92        | 731    | 760 | 8      | 1  | 11    | 740 | 0 | 66836    | 66106 | 1304.85 | <i>Rhizobium etli</i> bv. <i>phaseoli</i> str. IE4803 |
| 6                                          | P15C13F | OL467019  | 95.80        | 731    | 762 | 2      | 0  | 21    | 751 | 0 | 66106    | 66836 | 1339.94 | <i>Rhizobium etli</i> bv. <i>phaseoli</i> str. IE4803 |
|                                            | P15C13R | OL467020  | 95.80        | 731    | 762 | 2      | 0  | 12    | 742 | 0 | 66836    | 66106 | 1339.94 | <i>Rhizobium etli</i> bv. <i>phaseoli</i> str. IE4803 |
| 7                                          | P16C1F  | OL467021  | 96.84        | 737    | 760 | 2      | 2  | 13    | 749 | 0 | 66102    | 66836 | 1343.63 | <i>Rhizobium etli</i> bv. <i>phaseoli</i> str. IE4803 |
|                                            | P16C1R  | OL467022  | 96.84        | 737    | 760 | 2      | 2  | 12    | 748 | 0 | 66836    | 66102 | 1343.63 | <i>Rhizobium etli</i> bv. <i>phaseoli</i> str. IE4803 |
| 8                                          | P16C2F  | OL467023  | 95.80        | 731    | 762 | 1      | 0  | 21    | 751 | 0 | 66106    | 66836 | 1345.48 | <i>Rhizobium etli</i> bv. <i>phaseoli</i> str. IE4803 |
|                                            | P16C2R  | OL467024  | 95.80        | 731    | 762 | 1      | 0  | 12    | 742 | 0 | 66836    | 66106 | 1345.48 | <i>Rhizobium etli</i> bv. <i>phaseoli</i> str. IE4803 |
| 9                                          | P16C3F  | OL467025  | 95.21        | 399    | 418 | 13     | 3  | 20    | 418 | 0 | 1483     | 1088  | 645.60  | <i>Rhizobium miluonense</i> str.                      |
|                                            | P16C3R  | OL467026  | 93.57        | 615    | 653 | 19     | 6  | 42    | 653 | 0 | 648      | 1259  | 1014.93 | <i>Rhizobium</i> sp. strain MaGu46-1                  |

|    |        |          |       |     |     |   |   |    |     |   |       |       |         |                                                       |
|----|--------|----------|-------|-----|-----|---|---|----|-----|---|-------|-------|---------|-------------------------------------------------------|
| 10 | P16C4F | OL467027 | 99.86 | 730 | 761 | 1 | 0 | 21 | 750 | 0 | 66836 | 66107 | 1343.63 | <i>Rhizobium etli</i> bv. <i>phaseoli</i> str. IE4803 |
|    | P16C4R | OL467028 | 95.79 | 730 | 761 | 1 | 0 | 12 | 741 | 0 | 66107 | 66836 | 1343.63 | <i>Rhizobium etli</i> bv. <i>phaseoli</i> str. IE4803 |
| 11 | P16C5F | OL467029 | 99.86 | 731 | 762 | 0 | 0 | 21 | 751 | 0 | 66836 | 66107 | 1351.02 | <i>Rhizobium etli</i> bv. <i>phaseoli</i> str. IE4803 |
|    | P16C5R | OL467030 | 99.86 | 731 | 762 | 0 | 0 | 21 | 751 | 0 | 66107 | 66836 | 1351.02 | <i>Rhizobium etli</i> bv. <i>phaseoli</i> str. IE4803 |
| 12 | P16C6F | OL467031 | 99.86 | 722 | 749 | 0 | 0 | 17 | 738 | 0 | 66115 | 66836 | 1334.40 | <i>Rhizobium etli</i> bv. <i>phaseoli</i> str. IE4803 |
|    | P16C6R | OL467032 | 99.86 | 722 | 749 | 0 | 0 | 12 | 733 | 0 | 66836 | 66115 | 1334.40 | <i>Rhizobium etli</i> bv. <i>phaseoli</i> str. IE4803 |
| 13 | P16C7F | OL467033 | 97.46 | 731 | 762 | 2 | 0 | 21 | 751 | 0 | 66106 | 66836 | 1339.94 | <i>Rhizobium etli</i> bv. <i>phaseoli</i> str. IE4803 |
|    | P16C7R | OL467034 | 97.46 | 731 | 762 | 2 | 0 | 12 | 742 | 0 | 66836 | 66106 | 1339.94 | <i>Rhizobium etli</i> bv. <i>phaseoli</i> str. IE4803 |

#### Samples from 1300bp band

|    |        |          |       |      |      |   |   |    |      |   |        |        |         |                                                 |
|----|--------|----------|-------|------|------|---|---|----|------|---|--------|--------|---------|-------------------------------------------------|
| 1  | P18C1F | OL468634 | 99.89 | 950  | 970  | 1 | 0 | 21 | 970  | 0 | 107461 | 106512 | 1749.90 | <i>P. vulgaris</i> mitochondrion, compl. genome |
|    | P18C1R | OL468635 | 99.91 | 1181 | 1212 | 2 | 0 | 21 | 1201 | 0 | 107461 | 106281 | 2170.93 | <i>P. vulgaris</i> mitochondrion, compl. genome |
| 2  | P18C3F | OL468636 | 97.54 | 873  | 894  | 3 | 0 | 22 | 894  | 0 | 106281 | 107153 | 1596.63 | <i>P. vulgaris</i> mitochondrion, compl. genome |
|    | P18C3R | OL468637 | 97.28 | 1181 | 1213 | 4 | 0 | 22 | 1202 | 0 | 106281 | 107461 | 2159.85 | <i>P. vulgaris</i> mitochondrion, compl. genome |
| 3  | P18C5F | OL468638 | 97.86 | 963  | 983  | 3 | 0 | 21 | 983  | 0 | 106281 | 107243 | 1762.82 | <i>P. vulgaris</i> mitochondrion, compl. genome |
|    | P18C5R | OL468639 | 97.36 | 1181 | 1212 | 3 | 0 | 21 | 1201 | 0 | 106281 | 107461 | 2165.39 | <i>P. vulgaris</i> mitochondrion, compl. genome |
| 4  | P18C6F | OL468640 | 97.83 | 905  | 924  | 2 | 0 | 20 | 924  | 0 | 106281 | 107185 | 1661.26 | <i>P. vulgaris</i> mitochondrion, compl. genome |
|    | P18C6R | OL468641 | 90.64 | 1056 | 1164 | 9 | 0 | 20 | 1075 | 0 | 106281 | 107336 | 1901.32 | <i>P. vulgaris</i> mitochondrion, compl. genome |
| 5  | P18C7F | OL468642 | 97.84 | 951  | 971  | 3 | 0 | 21 | 971  | 0 | 106281 | 107231 | 1740.66 | <i>P. vulgaris</i> mitochondrion, compl. genome |
|    | P18C7R | OL468643 | 97.44 | 1181 | 1211 | 2 | 0 | 21 | 1201 | 0 | 106281 | 107461 | 2165.39 | <i>P. vulgaris</i> mitochondrion, compl. genome |
| 6  | P21C1F | OL468644 | 97.80 | 933  | 953  | 3 | 0 | 21 | 953  | 0 | 106281 | 107213 | 1707.42 | <i>P. vulgaris</i> mitochondrion, compl. genome |
|    | P21C1R | OL468645 | 98.77 | 962  | 973  | 2 | 0 | 12 | 973  | 0 | 107461 | 106500 | 1766.52 | <i>P. vulgaris</i> mitochondrion, compl. genome |
| 7  | P21C2F | OL468646 | 97.83 | 904  | 923  | 3 | 0 | 20 | 923  | 0 | 106281 | 107184 | 1653.87 | <i>P. vulgaris</i> mitochondrion, compl. genome |
|    | P21C2R | OL468647 | 97.44 | 965  | 976  | 2 | 0 | 12 | 963  | 0 | 107461 | 106497 | 1772.06 | <i>P. vulgaris</i> mitochondrion, compl. genome |
| 8  | P21C3F | OL468648 | 97.85 | 959  | 979  | 2 | 0 | 21 | 979  | 0 | 106281 | 107293 | 1760.98 | <i>P. vulgaris</i> mitochondrion, compl. genome |
|    | P21C3R | OL468649 | 98.80 | 981  | 992  | 1 | 0 | 12 | 992  | 0 | 107461 | 106481 | 1807.14 | <i>P. vulgaris</i> mitochondrion, compl. genome |
| 9  | P21C4F | OL468650 | 97.70 | 895  | 915  | 3 | 0 | 21 | 915  | 0 | 106282 | 107176 | 1637.25 | <i>P. vulgaris</i> mitochondrion, compl. genome |
|    | P21C4R | OL468651 | 99.90 | 969  | 980  | 2 | 0 | 12 | 980  | 0 | 107461 | 106493 | 1779.44 | <i>P. vulgaris</i> mitochondrion, compl. genome |
| 10 | P21C6F | OL468652 | 98.77 | 969  | 980  | 2 | 0 | 12 | 980  | 0 | 107461 | 106493 | 1779.44 | <i>P. vulgaris</i> mitochondrion, compl. genome |

|    |        |          |       |     |      |   |   |    |      |   |        |        |         |                                                 |
|----|--------|----------|-------|-----|------|---|---|----|------|---|--------|--------|---------|-------------------------------------------------|
|    | P21C6R | OL468653 | 98.80 | 991 | 1001 | 3 | 1 | 12 | 1001 | 0 | 107461 | 106471 | 1812.68 | <i>P. vulgaris</i> mitochondrion, compl. genome |
| 11 | P21C7F | OL468654 | 97.67 | 882 | 902  | 2 | 0 | 21 | 902  | 0 | 106281 | 107162 | 1618.79 | <i>P. vulgaris</i> mitochondrion, compl. genome |
|    | P21C7R | OL468655 | 98.75 | 949 | 960  | 1 | 0 | 12 | 960  | 0 | 107461 | 106513 | 1748.05 | <i>P. vulgaris</i> mitochondrion, compl. genome |
| 12 | P21C9F | OL468656 | 97.70 | 848 | 867  | 2 | 0 | 20 | 867  | 0 | 106281 | 107128 | 1556.00 | <i>P. vulgaris</i> mitochondrion, compl. genome |
|    | P21C9R | OL468657 | 99.70 | 922 | 924  | 1 | 0 | 3  | 924  | 0 | 107461 | 106540 | 1703.73 | <i>P. vulgaris</i> mitochondrion, compl. genome |
| 13 | P22C3F | OL468658 | 99.89 | 968 | 988  | 3 | 0 | 21 | 988  | 0 | 106281 | 107248 | 1772.06 | <i>P. vulgaris</i> mitochondrion, compl. genome |
|    | P22C3R | OL468659 | 98.81 | 999 | 1010 | 2 | 0 | 12 | 1010 | 0 | 107461 | 106463 | 1834.84 | <i>P. vulgaris</i> mitochondrion, compl. genome |
| 14 | P22C6F | OL468660 | 97.88 | 973 | 993  | 2 | 0 | 21 | 993  | 0 | 106281 | 107253 | 1786.83 | <i>P. vulgaris</i> mitochondrion, compl. genome |
|    | P22C6R | OL468661 | 98.75 | 954 | 965  | 2 | 0 | 12 | 965  | 0 | 107461 | 106508 | 1751.74 | <i>P. vulgaris</i> mitochondrion, compl. genome |
| 15 | P22C7F | OL468662 | 97.73 | 906 | 926  | 2 | 0 | 21 | 926  | 0 | 106281 | 107186 | 1663.10 | <i>P. vulgaris</i> mitochondrion, compl. genome |
|    | P22C7R | OL468663 | 97.73 | 906 | 990  | 2 | 0 | 12 | 990  | 0 | 107461 | 106483 | 1797.91 | <i>P. vulgaris</i> mitochondrion, compl. genome |

\*abbreviations: Al, alignment; E, E-value; GO, gap open; MM, mismatch; Qu, Query

**Table S3.** Diversity parameters of prokaryotic communities in rhizosphere and endosphere samples of *Phaseolus vulgaris*.

| Sample ID                   | Name | Compartment | Stage       | Replicate | Observed | $H'$   | $\lambda$ | $J'$    |
|-----------------------------|------|-------------|-------------|-----------|----------|--------|-----------|---------|
| CA1MFSS01-01-S1_L001_R1_001 | VE2  | Endosphere  | Vegetative  | 2         | 965      | 2.7858 | 0.90844   | 0.38262 |
| CA1MFSS02-02-S1_L001_R1_001 | VR2  | Rhizosphere | Vegetative  | 2         | 3883     | 6.8972 | 0.96610   | 0.77237 |
| CA1MFSS03-03-S1_L001_R1_001 | FE2  | Endosphere  | Flowering   | 2         | 1017     | 2.7996 | 0.90849   | 0.38219 |
| CA1MFSS04-04-S1_L001_R1_001 | FR2  | Rhizosphere | Flowering   | 2         | 4060     | 6.7600 | 0.99505   | 0.74773 |
| CA1MFSS05-05-S1_L001_R1_001 | PE1  | Endosphere  | Pod filling | 1         | 493      | 2.9105 | 0.91670   | 0.43893 |
| CA1MFSS06-06-S1_L001_R1_001 | PR1  | Rhizosphere | Pod filling | 1         | 10703    | 7.1621 | 0.99631   | 0.77193 |
| CA1MFSS07-07-S1_L001_R1_001 | VE1  | Endosphere  | Vegetative  | 1         | 1403     | 3.0901 | 0.91979   | 0.39860 |
| CA1MFSS08-08-S1_L001_R1_001 | VR1  | Rhizosphere | Vegetative  | 1         | 3853     | 6.9301 | 0.99632   | 0.77489 |
| CA1MFSS09-09-S1_L001_R1_001 | FE1  | Endosphere  | Flowering   | 1         | 1139     | 2.9977 | 0.92243   | 0.40329 |
| CA1MFSS10-10-S1_L001_R1_001 | FR1  | Rhizosphere | Flowering   | 1         | 3916     | 6.9223 | 0.99650   | 0.77067 |

$H'$ , Shannon index;  $\lambda$ , Simpson's index;  $J'$ , Evenness

**Table S6.** Sequences of degenerate primers used for PCR-based confirmation of predicted functional genes (Table 3)

| Function                 | Gene | Primer sequences                                                                       | PCR product | Annealing temp. | Ref.       |
|--------------------------|------|----------------------------------------------------------------------------------------|-------------|-----------------|------------|
| Nitrogenase              | nifH | F: 5' – ADN GCC ATC ATY TCN CC - 3'<br>R: 5' – TGY GAY CCN AAR GCN G - 3'              | 359bp       | 54°C            | [140]      |
| GlcNAc transferase       | nodC | F: 5' - TG ATY GAY ATG GAR TAY TGG CT – 3'<br>R: 5' - CGY GAC ARC CAR TCG CTR TTG - 3' | 640 bp      | 65°C-50°C       | [141]      |
| Chemotaxis and motility  | motA | F: 5' - GTB CTS GGS GTS ATC AAG G - 3'<br>R: 5' - GGC GAR ARC AAG GCG GC - 3'          | 293 bp      | 54°C            | This study |
| Butanediol dehydrogenase | butB | F: 5' - CAC GAT CAT GTG CGC GAA G - 3'<br>R: 5' - CGC GTG CAM TGG TGC GG - 3'          | 453 bp      | 46°C            | This study |
| Chemotaxis and motility  | gspD | R: 5' - CGC GTG CAM TGG TGC GG - 3'<br>F: 5' - ACG TGC TGT CGA CGC CGA A - 3'          | 427 bp      | 50°C            | This study |

Supplementary Figure S1.

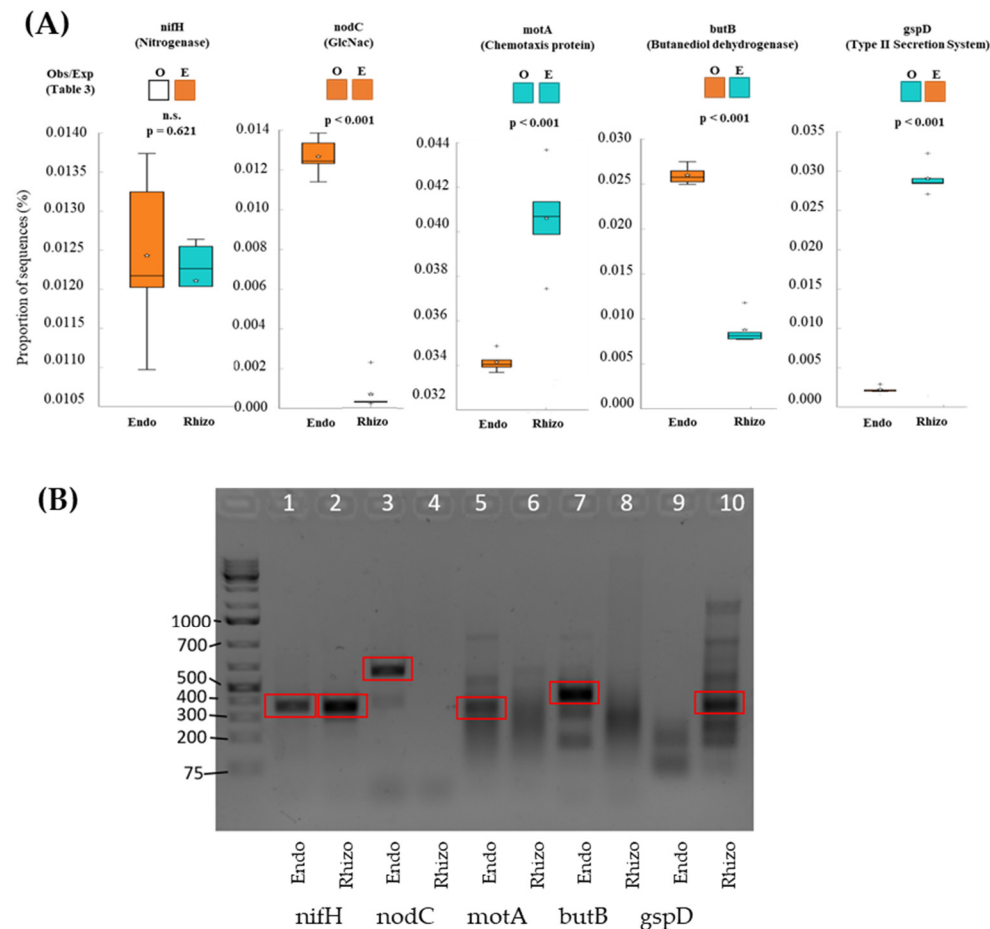

**Supplementary Figure S1.** Enrichment of predicted functional genes in the endosphere versus rhizosphere. (A) The proportion of each gene is expressed in percent (%) of all sequences in the inferred metagenome of each sample and presented as boxplots for the endosphere (orange) versus rhizosphere (blue). Insets repeat the observed (O) and expected (E) enrichment of each gene as presented in Table 3, p-values reports the results of Welch's t-test adjusted for multiple comparisons with the FDR correction using the Benjamin-Hochberg method (n = 5 biologically independent replicates per compartment). (B) Agarose gel illustrating the amplification products obtained with degenerate primers (see Table S6), red squares highlight the band of the predicted size. gspD, general secretion pathway protein D; motA, motility protein A; butB, butanediol dehydrogenase; nodC, nodulation gene C, nifH, nitrogen fixing H.

**Supplementary Text S1. PCR conditions for the amplification of five key genes selected to validate predicted functions:**

We used degenerate primers (see Table S6) to amplify each gene separately for each compartment, using as template pooled DNA prepared as equimolar mixture of the total DNA in the five original samples per compartment.

For *nifH*, we used the PCR protocol published for the respective primers [140]. The 25 µl PCR reaction mixture contained approximately 20 ng of total DNA for rhizosphere samples and the same amount for root endosphere samples, 10X PCR reaction buffer, MgCl<sub>2</sub> 2 mM, 1 µM of each primer, 100 µM each dNTP, and 1.5U of Taq Platinum DNA Polymerase (Invitrogen). After initial denaturation at 94°C for 15 min., each thermal cycle was performed as follows: denaturation at 94°C for 1 min., annealing at 54°C for 45 sec, and elongation 72°C for 1 min. At the end of 34 cycles, the final extension step was at 72°C for 10 min.

For *nodC*, we applied a “touchdown” PCR protocol following description by Sariota et al [141]. The 25 µl PCR reaction mixture contained approximately 10 ng of total DNA for rhizosphere samples and 10 ng for root endosphere samples, 10X PCR reaction buffer, MgCl<sub>2</sub> 2 mM, 1 µM of each primer, 100 µM each dNTP, and 1.5U of Taq Platinum DNA Polymerase (Invitrogen). Initial denaturation for 3 min at 94 °C, then 1 cycle of 96 °C for 20 sec, 65 °C for 30 sec and 72 °C for 30 sec, 2 cycles 96 °C for 20 sec, 62 °C for 30 sec and 72 °C for 35 sec, then 3 cycles of 96 °C for 20 sec, 59 °C for 30 sec and 72 °C for 40 sec, then 4 cycles of 96 °C for 20 sec, 56 °C for 30 sec and 72 °C for 45 sec, then 5 cycles 96 °C for 20 sec, 53 °C for 30 sec and 72 °C for 50 sec, then 25 cycles of 94 °C for 20 sec, 50 °C for 30 sec and 72 °C for 60 sec, and a final elongation at 72 °C for 5min.

For genes *gspD*, *butB* and *motA*, the 25 µl PCR reaction mixture contained approximately 10 ng of total DNA for rhizosphere samples and 10 ng for root endosphere samples, 10X PCR reaction buffer, MgCl<sub>2</sub> 2 mM, 1 µM of each primer, 100 µM each dNTP, and 1.5U of Taq Platinum DNA Polymerase (Invitrogen). After initial denaturation at 94°C for 3 min., each thermal cycle was performed as follows: denaturation at 94°C for 30 sec, annealing at temperatures shown at Table S6 for 45 sec, and elongation 72°C for 1 min. At the end of 34 cycles, the final extension step was at 72°C for 5 min.
